# Supplementary material for: Using ESTs to improve the accuracy of de novo gene prediction
Source: Springer Nature journal article supplement (doi:10.1186/1471-2105-7-327), 2006-07-03

EST Alignments

ESTseq

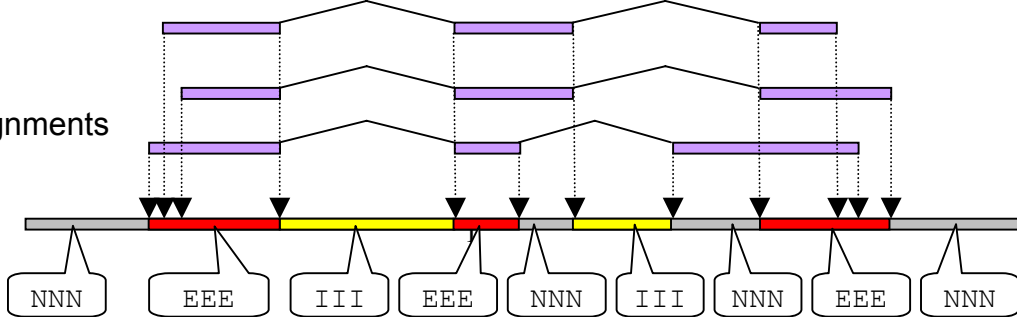

Supplement: 12859_2006_1066_MOESM1_ESM.pdf [file 12859_2006_1066_MOESM1_ESM.pdf]
